# Supplementary material
Source: MDPI journal article supplement (https://www.mdpi.com/2071-1050/11/1/110)
Supplement: s1 [file s1]

| Document-code     | Petitioner                         | Sub-petitioners                                                                                                                                                                 | Content of request (dictate)                                                                                                                                                                     | Indicator                                                                                                                                   | Operationalized                                                                                                                                        | Meta-governance strategy                                                    |
|-------------------|------------------------------------|---------------------------------------------------------------------------------------------------------------------------------------------------------------------------------|--------------------------------------------------------------------------------------------------------------------------------------------------------------------------------------------------|---------------------------------------------------------------------------------------------------------------------------------------------|--------------------------------------------------------------------------------------------------------------------------------------------------------|-----------------------------------------------------------------------------|
| 30 196<br>Nr. 577 | Van der Lee (Greens)               | Moorlag (Labour)<br>Sazias (50Plus)<br>Wassenberg (Party for the Animals)                                                                                                       | Requests the Cabinet to involve the financial sector in the Agreement on Climate and look for possibilities to enhance sustainable investment-portfolios                                         | Proposals regarding the inclusiveness of the governance network                                                                             | The meta-governor tries to influence the composition of the network                                                                                    | Network design and composition (hands-off)                                  |
| 34 723<br>Nr. 20  | Jetten (Democrats)                 | Dik-Faber (Christian Union)                                                                                                                                                     | Requests the Cabinet to inform citizens about the sustainability of their heat-source;<br>Requests the Cabinet to make agreements with the sector to enhance the sustainability of heat-supply   | Proposals to determine what topics are on the agenda                                                                                        | The meta-governor sets a financial, legal or discursive framework for the governance network                                                           | Network framing (hands-off)                                                 |
| 31 936<br>Nr. 450 | Kröger (Greens)                    | Van der Lee (Greens)                                                                                                                                                            | Requests the Cabinet to stimulate that the Mobility-table, in relation to the Agreement on Climate, involves the Co2-reduction of the aviation sector in their negotiations                      | Proposals to determine what topics are on the agenda                                                                                        | The meta-governor sets a financial, legal or discursive framework for the governance network                                                           | Network framing (hands-off)                                                 |
| 30 196<br>Nr. 595 | Yesilgöz-Zegerius (Liberals)       | Jetten (Democrats)                                                                                                                                                              | Requests the Cabinet to add a cross-sectional theme to the elaboration of the Agreement on Climate, 'obstructing regulations'                                                                    | Proposals to determine what topics are on the agenda                                                                                        | The meta-governor sets a financial, legal or discursive framework for the governance network                                                           | Network framing (hands-off)                                                 |
| 30 196<br>Nr. 585 | Mulder (Christian Democrats)       | Yesilgöz-Zegerius (Liberals)<br>Jetten (Democrats)<br>Van der Lee (Greens)<br>Dik-Faber (Christian Union)<br>Moorlag (Labour)<br>Sazias (50Plus)<br>Beckerman (Socialist Party) | Requests the Cabinet to, while elaborating the Agreement on Climate, provide the opportunity for citizens and small businesses to deliver inputs, e.g. by internet consultation                  | Proposals regarding the inclusiveness of the governance network<br>Proposals regarding internal procedures and public transparency          | The meta-governor tries to influence the composition of the network<br>The meta-governor tries to influence the internal rules and followed procedures | Network design and composition<br>Network framing (hands-off)               |
| 34 672<br>Nr. 34  | Kops (Party For Freedom)           |                                                                                                                                                                                 | Requests the Cabinet to stop all payments regarding the energy transition and assure the energy-bill for households will decrease                                                                | Proposals regarding financial means and budget                                                                                              | The meta-governor sets a financial, legal or discursive framework for the governance network                                                           | Network framing (hands-off)                                                 |
| 30 196<br>Nr. 580 | Wassenberg (Party for the Animals) | Van der Lee (Greens)<br>Moorlag (Labour)<br>Sazias (50Plus)<br>Beckerman (Socialist Party)                                                                                      | Requests the Cabinet to invite a sufficient amount of nature- and environmental organizations (NGO's) to the sector-tables in which the negotiations on the Agreement on Climate will take place | Proposals regarding the inclusiveness of the governance network<br>Proposals regarding the position of particular actors within the network | The meta-governor tries to influence the composition of the network                                                                                    | Network design and composition (hands-off)<br>Network management (hands-on) |

Table 1: Overview of Parliamentary Resolutions concerning the Agreement on Climate, submitted between January 1st and June 11th, 2018 (1)

| Document-code     | Petitioner                         | Sub-petitioners                                                                                                                                                                               | Content of request (dictate)                                                                                                                                                                                      | Indicator                                                       | Operationalized                                                                                 | Meta-governance strategy    |
|-------------------|------------------------------------|-----------------------------------------------------------------------------------------------------------------------------------------------------------------------------------------------|-------------------------------------------------------------------------------------------------------------------------------------------------------------------------------------------------------------------|-----------------------------------------------------------------|-------------------------------------------------------------------------------------------------|-----------------------------|
| 34 627<br>Nr. 35  | Kops (Party For Freedom)           |                                                                                                                                                                                               | Requests the Cabinet to proceed the conversations with third parties (e.g. NGO's, net-managers and companies) regarding the National Agreement on Climate in publicity                                            | Proposals regarding internal procedures and public transparency | The meta-governor tries to influence the internal rules and followed procedures                 | Network design (hands-off)  |
| 30 196<br>Nr. 575 | Van der Lee (Greens)               | Yesilgöz-Zegerius (Liberals)<br>Jetten (Democrats)<br>Wassenberg (Party for the Animals)<br>Dik-Faber (Christian Union)<br>Moorlag (Labour)<br>Sazias (50Plus)<br>Beckerman (Socialist Party) | Requests the Cabinet to inform the Parliament halfway June regarding the constitution of the 'Climate-tables', working groups and the general progress regarding the National Agreement on Climate                | Asking for information on the governance network                | The meta-governor monitors the performance of the network in terms of the surrounding framework | Network framing (hands-off) |
| 32 813<br>Nr. 176 | Van Raan (Party for the Animals)   |                                                                                                                                                                                               | Requests the Cabinet to safeguard a certain degree of flexibility within the Agreement on Climate, in the case adjustments may be necessary to achieve the set climate goals                                      | Proposals regarding internal procedures and public transparency | The meta-governor tries to influence the internal rules and followed procedures                 | Network design (hands-off)  |
| 30 196<br>Nr. 582 | Wassenberg (Party for the Animals) | Moorlag (Labour)<br>Van der Lee (Greens)<br>Beckerman (Socialist Party)                                                                                                                       | Requests the Cabinet to explicitly address the shrinkage of the amount of cattle during the negotiations on the Agreement on Climate                                                                              | Proposals to determine what topics are on the agenda            | The meta-governor sets a financial, legal or discursive framework for the governance network    | Network framing (hands-off) |
| 30 196<br>Nr. 581 | Wassenberg (Party for the Animals) | Beckerman (Socialist Party)<br>Sazias (50Plus)                                                                                                                                                | Requests the Cabinet to adjust the goals as formulated in the Agreement on Climate periodically if developments enable this                                                                                       | Proposals regarding internal procedures and public transparency | The meta-governor tries to influence the internal rules and followed procedures                 | Network design (hands-off)  |
| 30 196<br>Nr. 594 | Sazias (50Plus)                    | Van der Lee (Greens)<br>Moorlag (Labour)<br>Beckerman (Socialist Party)                                                                                                                       | Requests the Cabinet to, during the elaboration of the Agreement on Climate, aim at a capacity-proportional divide of costs in society where possible                                                             | Proposals to determine what topics are on the agenda            | The meta-governor sets a financial, legal or discursive framework for the governance network    | Network framing (hands-off) |
| 29 023<br>Nr. 234 | Moorlag (Labour)                   | Van der Lee (Greens)<br>Beckerman (Socialist Party)                                                                                                                                           | Requests the Cabinet to include agreements on sustainability-criteria for production- and supply-companies of energy when those are privatized by shareholding governments                                        | Proposals to determine what topics are on the agenda            | The meta-governor sets a financial, legal or discursive framework for the governance network    | Network framing (hands-off) |
| 30 196<br>Nr. 596 | Van der Lee (Greens)               | Beckerman (Socialist Party)<br>Moorlag (Labour)<br>Sazias (50Plus)                                                                                                                            | Requests the Cabinet to stimulate that the transparency of the used calculations for assessing the Agreement on Climate, in particular by the Dutch Environmental Assessment Agency (PBL), is as high as possible | Proposals regarding internal procedures and public transparency | The meta-governor tries to influence the internal rules and followed procedures                 | Network design (hands-off)  |

Table 2: Overview of Parliamentary Resolutions concerning the Agreement on Climate, submitted between January 1st and June 11th, 2018 (2)



| Document-code | Petitioner                            | Question title                                                                                         | Content of coded questions                                                                                                                                                                                                                                                                                                                                                                                                                                                                                                                                                                                                                                                                                                | Indicator                                                                                                                    | Operationalized                                                                                                                                                                 | Meta-governance strategy                                         |
|---------------|---------------------------------------|--------------------------------------------------------------------------------------------------------|---------------------------------------------------------------------------------------------------------------------------------------------------------------------------------------------------------------------------------------------------------------------------------------------------------------------------------------------------------------------------------------------------------------------------------------------------------------------------------------------------------------------------------------------------------------------------------------------------------------------------------------------------------------------------------------------------------------------------|------------------------------------------------------------------------------------------------------------------------------|---------------------------------------------------------------------------------------------------------------------------------------------------------------------------------|------------------------------------------------------------------|
| 2018Z05436    | Van Raan<br>(Party for the Animals)   | ...about the scientific anchorage of the Agreement on Climate                                          | 7 Will measures concerning production volumes and behavioural change be discussed on the sector-tables or the Climate Consultation? If not, why?<br>9 Do you think the KNAW is more independent and therefore in a better position to make calculations concerning the agreement? If so, are you willing to give KNAW a role in the scientific anchorage of the Agreement on Climate? If not, why?<br>10 How is the scientific anchorage of the Agreement on Climate designed? Which institutions and scientists are involved, and on which moments?<br>11 How will be dealt with unexpected changes, for instance when scientific insights change or measures will fall short? What space is incorporated in the design? | Asking for information on the governance network<br>Proposals regarding the position of particular actors within the network | The meta-governor monitors the performance of the network in terms of the surrounding framework<br>The meta-governor tries to influence the composition of the network          | Network framing (hands-off)<br><br>Network management (hands-on) |
| 2018Z04049    | Wassenberg<br>(Party for the Animals) | ...about the message ‘Wood-burning in neighbourhoods should be stopped’.                               | 8 Are you willing to let go the definition of biomass as a sustainable alternative for the generation of electricity or the heating of spaces within the Agreement on Climate and other Green Deals, and to quit subsidies for pellet stoves and biomass-kettles? If not, why?                                                                                                                                                                                                                                                                                                                                                                                                                                            | Proposals to determine what topics are on the agenda<br>Proposals regarding internal procedures and public transparency      | The meta-governor sets a financial, legal or discursive framework for the governance network<br>The meta-governor tries to influence the internal rules and followed procedures | Network design (hands-off)<br><br>Network framing (hands-off)    |
| 2018Z08677    | Wassenberg<br>(Party for the Animals) | ...about the message that the co-firing of biomass causes a significant increase of particulate matter | 8 Are you willing to let go the definition of biomass as a sustainable alternative for the generation of electricity or the heating of spaces within the Agreement on Climate and other Green Deals, and to quit subsidies for pellet stoves and biomass-kettles? If not, why?                                                                                                                                                                                                                                                                                                                                                                                                                                            | Proposals to determine what topics are on the agenda<br>Proposals regarding internal procedures and public transparency      | The meta-governor sets a financial, legal or discursive framework for the governance network<br>The meta-governor tries to influence the internal rules and followed procedures | Network design (hands-off)<br><br>Network framing (hands-off)    |
| 2018Z03953    | Kröger<br>(Greens)                    | ...about wind turbines and Lelystad Airport                                                            | 3 How are you going to prevent that the expansion of Lelystad Airport will interfere with the governmental ambitions to realize wind turbines in the region of Flevoland, and therefore hinders the already concluded Energy-agreement, and the yet-to-conclude Agreement on Climate?                                                                                                                                                                                                                                                                                                                                                                                                                                     |                                                                                                                              |                                                                                                                                                                                 |                                                                  |

Table 3: Overview of Parliamentary Questions concerning the Agreement on Climate, submitted between January 1st and June 11th, 2018 (1)

| Document-code | Petitioner                             | Question title                                                                                                      | Content of coded questions                                                                                                                                                                                                                                                                                                                                                                                                                                                                                                                                                          | Indicator                                                                                                                        | Operationalized                                                                                                                                                                                 | Meta-governance strategy                                         |
|---------------|----------------------------------------|---------------------------------------------------------------------------------------------------------------------|-------------------------------------------------------------------------------------------------------------------------------------------------------------------------------------------------------------------------------------------------------------------------------------------------------------------------------------------------------------------------------------------------------------------------------------------------------------------------------------------------------------------------------------------------------------------------------------|----------------------------------------------------------------------------------------------------------------------------------|-------------------------------------------------------------------------------------------------------------------------------------------------------------------------------------------------|------------------------------------------------------------------|
| 2018Z08358    | Van der Lee (Greens)                   | ...about the risks of overload of the electricity supply for the digital front-runners' position of the Netherlands | 2 Is it true that there is a threatening shortage of electricity-supply on favourable locations for data-centres, e.g. Schiphol, Amsterdam Science Park and Amsterdam South-East?<br>10 Are you, concluding, willing to promote the discussion of these matters at the Electricity-table of the Agreement on Climate?                                                                                                                                                                                                                                                               | Proposals to determine what topics are on the agenda                                                                             | The meta-governor sets a financial, legal or discursive framework for the governance network                                                                                                    | Network framing (hands-off)                                      |
| 2018Z00805    | Van der Lee (Greens)<br>Diks (Greens)  | ...about the report 'Human rights in wind supply chains' by ActionAid and SOMO                                      | 6 How do you assure the incorporation of human rights in wind supply chains in future tenders and permit-requests for wind-energy and the National Agreement on Energy and Climate?<br>7 Are you willing to initiate binding agreements with the energy-sector, offshore construction and wind turbine producers concerning identification, prevention and mitigation of environmental and human rights-related risks, within the current process, or differently? If not, why? And if so, how are you planning to do so, and when will the parliament be informed on the progress? | Proposals to determine what topics are on the agenda<br>Asking for information on the governance network                         | The meta-governor sets a financial, legal or discursive framework for the governance network<br>The meta-governor monitors the performance of the network in terms of the surrounding framework | Network framing (hands-off)                                      |
| 2018Z00120    | Snels (Greens)<br>Van der Lee (Greens) | ...about the demand of higher investment-criteria for loans regarding fossil investments                            | 10 Are you willing – in European councils or outside - to express that the Netherlands are in favour of higher capital-criteria concerning loans for fossil companies? If not, are you at least willing to make these matters one of the subjects for negation during the National Agreement on Climate, which you hope to conclude with societal actors, including the financial sector, in 2018?                                                                                                                                                                                  | Proposals to determine what topics are on the agenda<br>Proposals regarding the position of particular actors within the network | The meta-governor sets a financial, legal or discursive framework for the governance network                                                                                                    | Network framing (hands-off)<br><br>Network management (hands-on) |

Table 4: Overview of Parliamentary Questions concerning the Agreement on Climate, submitted between January 1st and June 11th, 2018 (2)
